# Supplementary material for: Improved Scaling and Impact Metrics for Euro-Atlantic Atmospheric Rivers
Source: Research Square preprint supplement (doi:10.21203/rs.3.rs-7876106/v1), 2025-11-11
Supplement: Supplementary file 1 [file e356d73f941fb105348e9432.pdf]

# Improved Scaling and Impact Metrics for Euro-Atlantic Atmospheric Rivers

Venugopal Thandlam<sup>1,2,3,\*</sup>, Erik Sahl  <sup>1</sup>, and Anna Rutgersson<sup>1,2</sup>

<sup>1</sup>Air, Water and Landscape Science (LUVAL), Department of Earth Sciences, Uppsala University, Uppsala, Sweden

<sup>2</sup>Centre of Natural Hazards and Disaster Science (CNDS), Uppsala University, Uppsala, Sweden

<sup>3</sup>The Center for Environment and Development Studies Research Forum (CEFO), Uppsala University, Uppsala, Sweden

October 16, 2025

## Supplementary information

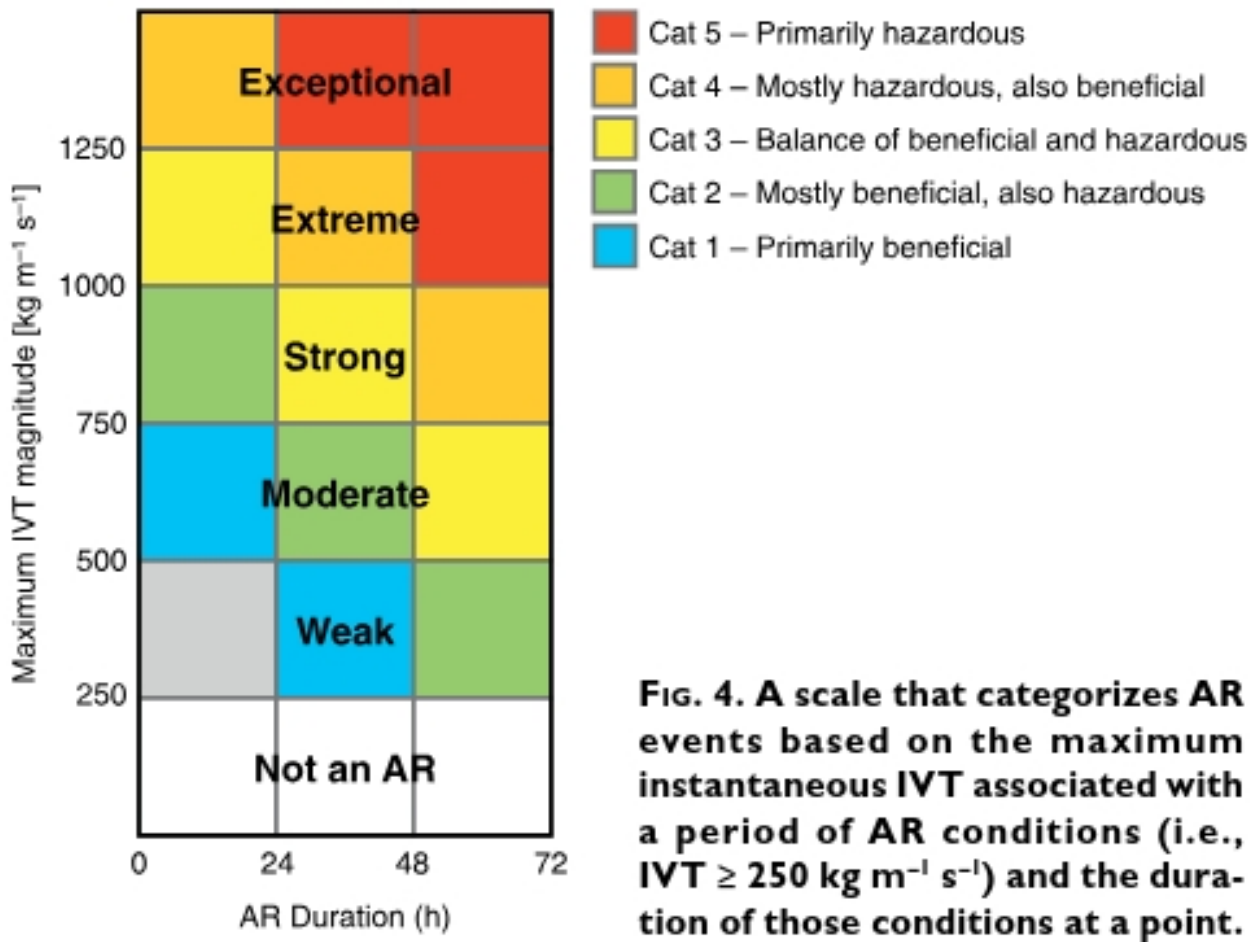

Figure S1: The original AR scale developed by Ralph et al.,[1]

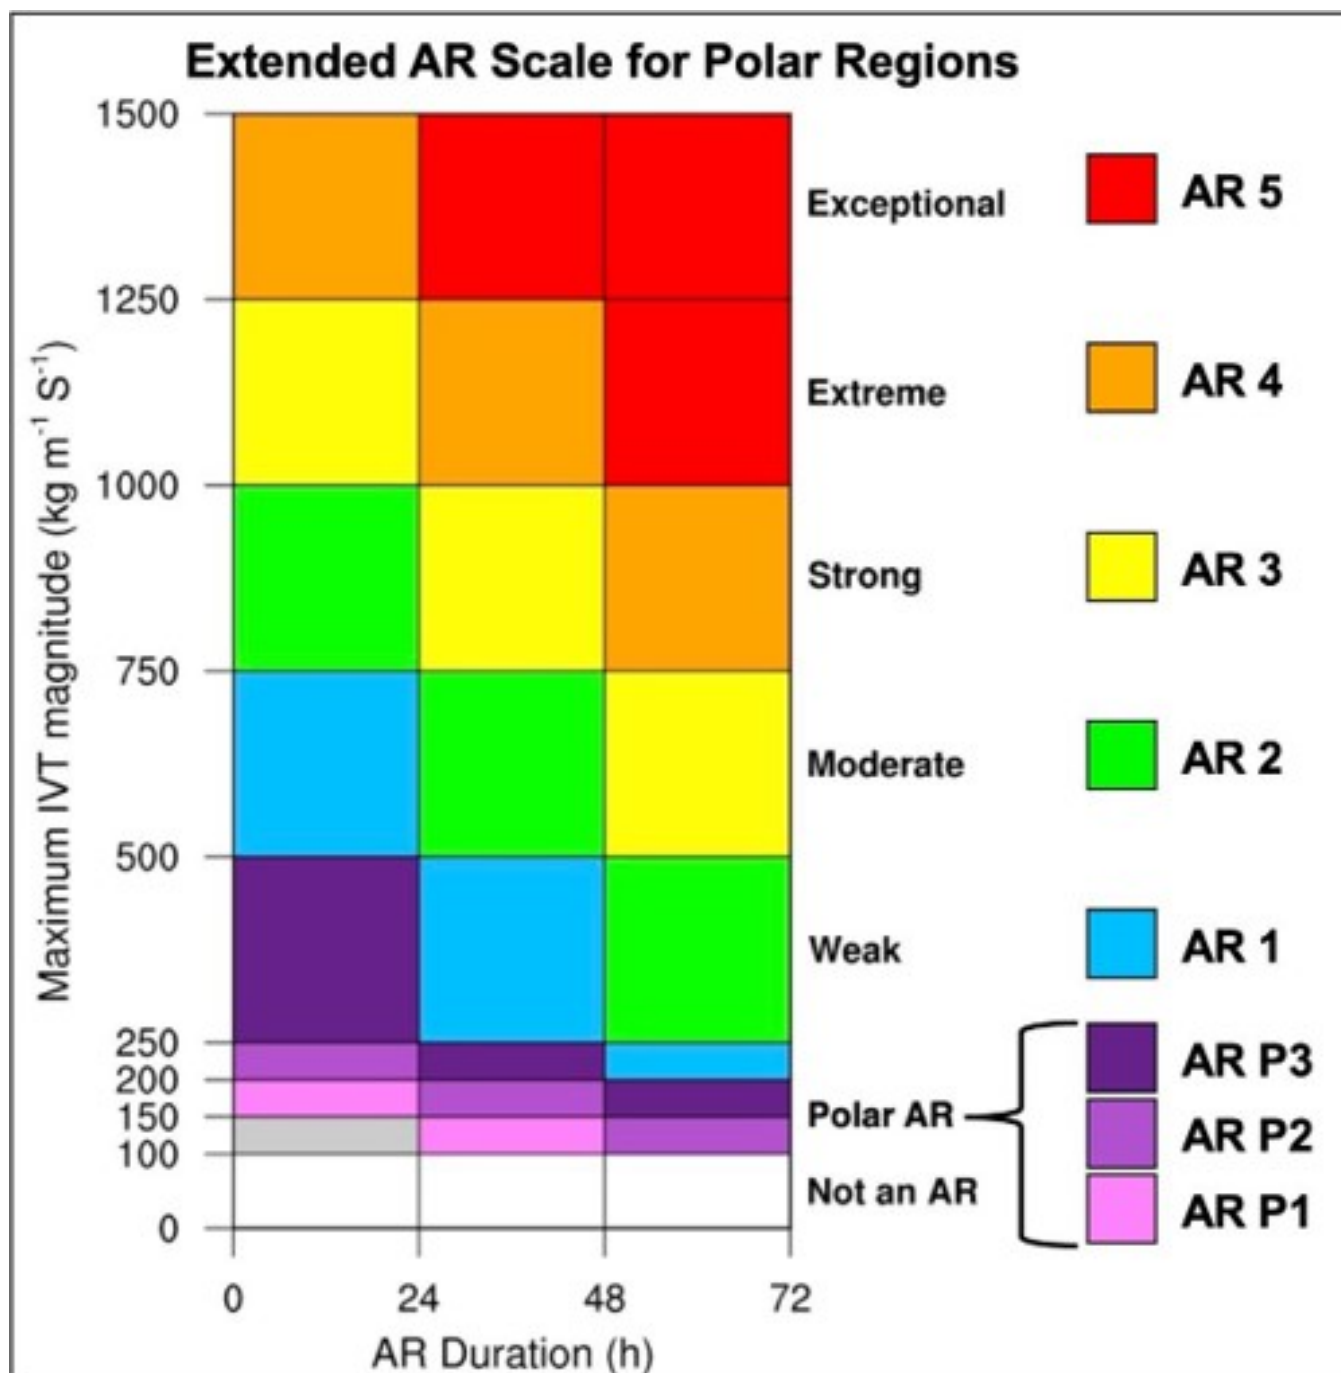

Figure S2: Extended AR scale for polar regions [2]

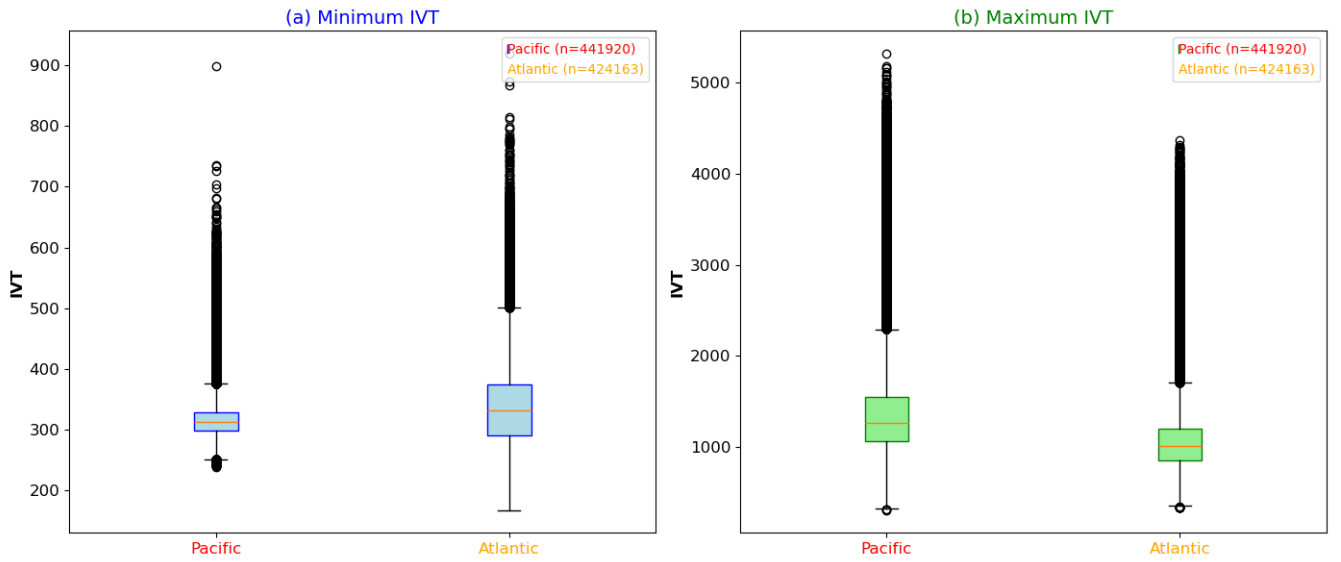

Figure S3: Comparison of (a) minimum and (b) maximum IVTs observed in each AR during the study period in the Pacific and Atlantic.

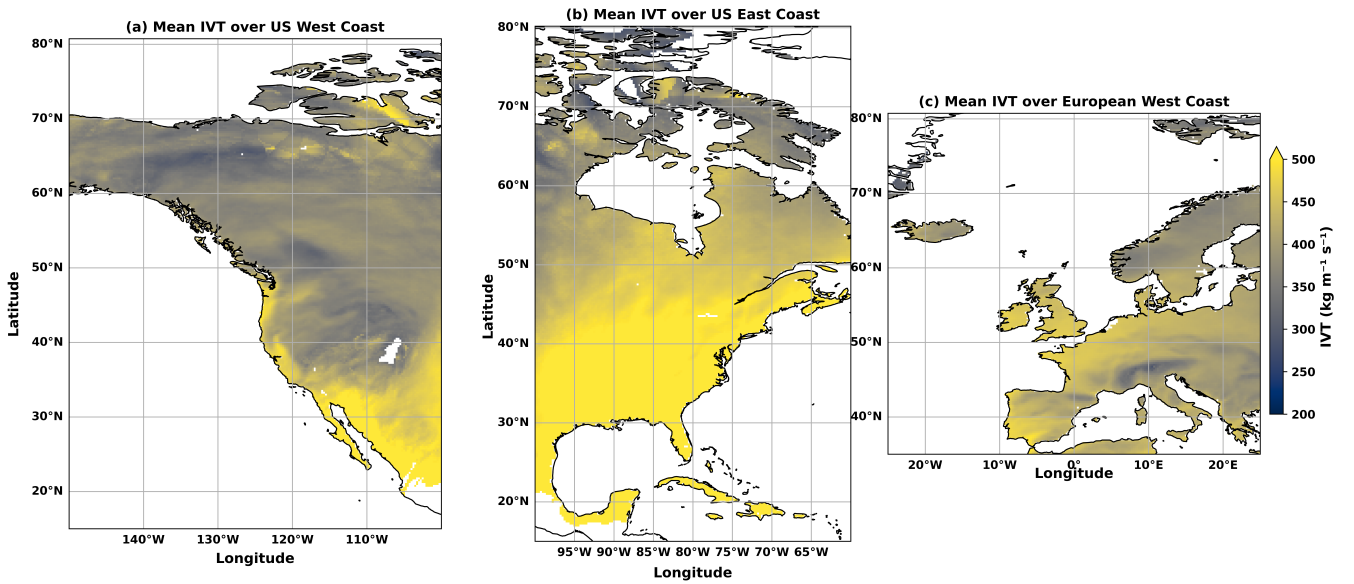

Figure S4: Mean AR IVT between 1970-2022 over (a) The western North American coast, (b) the Eastern North American coast, and (c) Europe.

### Maximum IVT over land

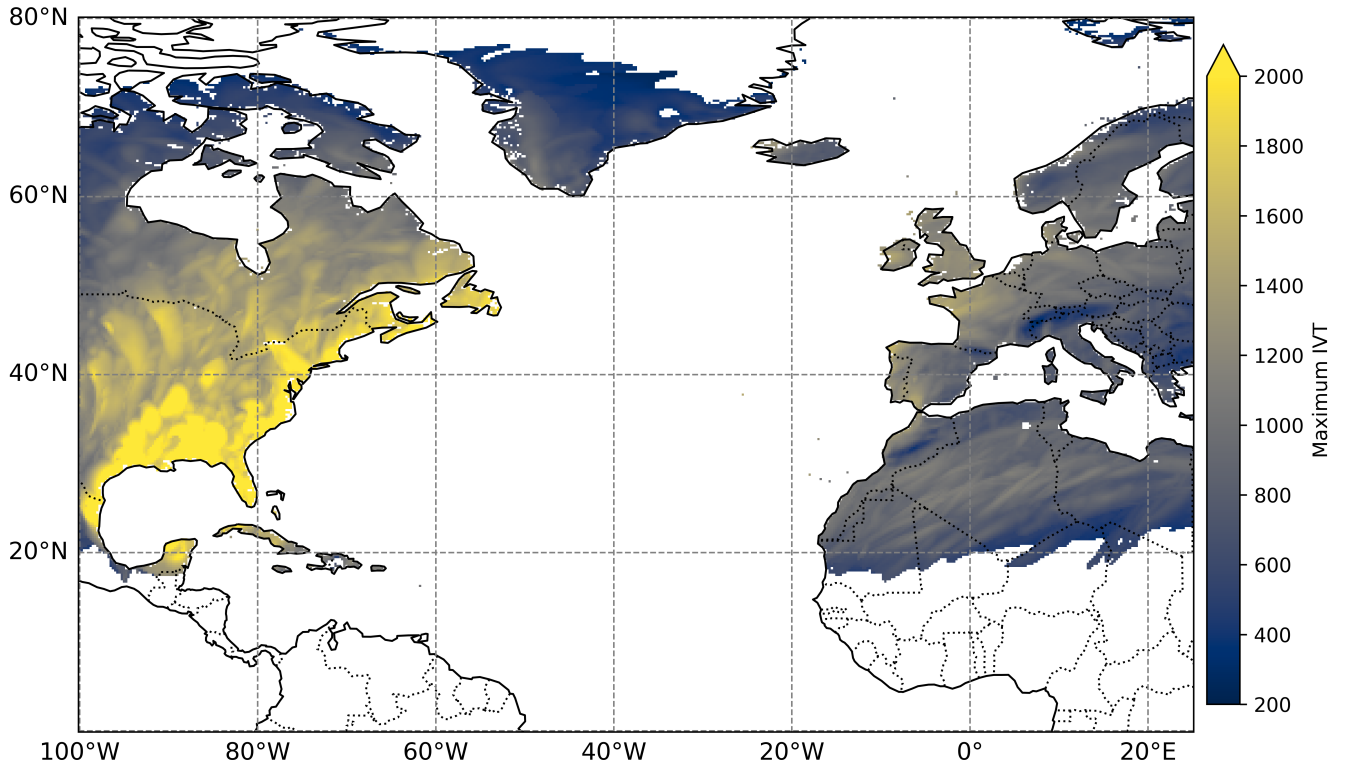

Figure S5: Maximum AR IVT over land in the study region from 1940 to 2022.

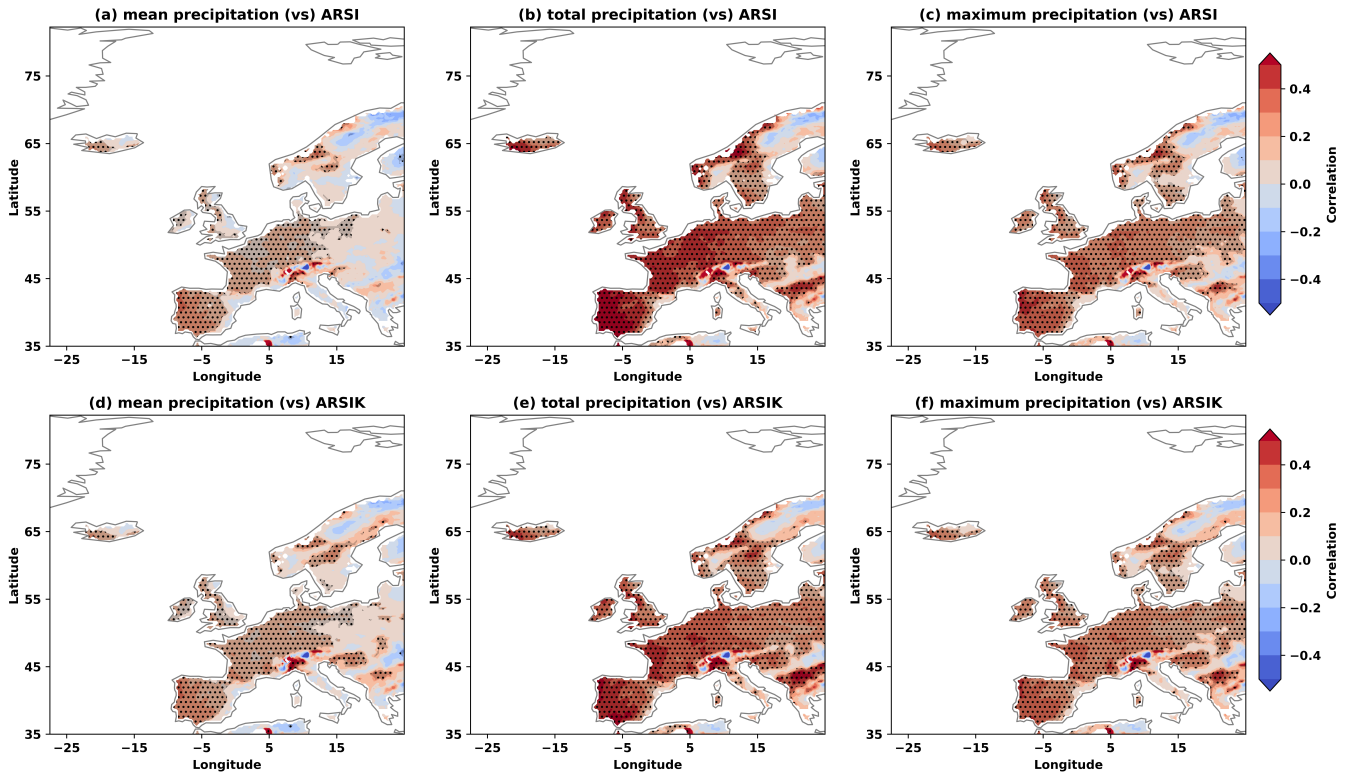

Figure S6: Correlations of 3-day ARSI (1st row), and ARSIK (2nd row) with 3-day mean precipitation, 3-day total precipitation, and 3-day maximum precipitation over Europe during 1950-2022. Black hatches show the areas with a significance of 95%.

## References

- [1] F Martin Ralph, Jonathan J Rutz, Jason M Cordeira, Michael Dettinger, Michael Anderson, David Reynolds, Lawrence J Schick, and Chris Smallcomb. A scale to characterize the strength and impacts of atmospheric rivers. *Bulletin of the American Meteorological Society*, 100(2):269–289, 2019.
- [2] Zhenhai Zhang, F Martin Ralph, Xun Zou, Brian Kawzenuk, Minghua Zheng, Irina V Gorodetskaya, Penny M Rowe, and David H Bromwich. Extending the center for western weather and water extremes (cw3e) atmospheric river scale to the polar regions. *The Cryosphere*, 18(11):5239–5258, 2024.
